# Supplementary material for: Endophytic fungal diversity of Fragaria vesca, a crop wild relative of strawberry, along environmental gradients within a small geographical area
Source: PeerJ. 2017 Jan 5;5:e2860. doi: 10.7717/peerj.2860 (PMC5289447; doi:10.7717/peerj.2860)
Supplement: Data S1 [file peerj-05-2860-s001.xlsx]

## Sheet: Sheet1
				Root ID	1	2	3	4	5	6	7	8	9	10	11	12	13	14	15	16	17	18	19	20	21	22	23	24	25	26	27	28	29	30	31	32	33	34	35	36	37	38	39	40	41	42
				Location	A	A	A	A	A	A	B	B	B	B	B	B	C	C	C	C	C	C	D	D	D	D	D	D	E	E	E	E	E	E	F	F	F	F	F	F	G	G	G	G	G	G
				Plant ID	A1	A1	A1	A2	A2	A2	B1	B1	B1	B2	B2	B2	C1	C1	C1	C2	C2	C2	D1	D1	D1	D2	D2	D2	E1	E1	E1	E2	E2	E2	F1	F1	F1	F2	F2	F2	G1	G1	G1	G2	G2	G2
				P	5	5	5	5	5	5	25	25	25	25	25	25	75	75	75	75	75	75	75	75	75	75	75	75	75	75	75	75	75	75	10	10	10	10	10	10	5	5	5	5	5	5
				Ca	3500	3500	3500	3500	3500	3500	17500	17500	17500	17500	17500	17500	17500	17500	17500	17500	17500	17500	17500	17500	17500	17500	17500	17500	25000	25000	25000	25000	25000	25000	43750	43750	43750	43750	43750	43750	43750	43750	43750	43750	43750	43750
				Humus	9.08	9.08	9.08	9.08	9.08	9.08	11.79	11.79	11.79	11.79	11.79	11.79	11.52	11.52	11.52	11.52	11.52	11.52	11.79	11.79	11.79	11.79	11.79	11.79	3.94	3.94	3.94	3.94	3.94	3.94	8.41	8.41	8.41	8.41	8.41	8.41	2.72	2.72	2.72	2.72	2.72	2.72
Rarity	Fungus Subgroup	Fungus Group	Fungus ID	pH	7.87	7.87	7.87	7.87	7.87	7.87	8.43	8.43	8.43	8.43	8.43	8.43	7.9	7.9	7.9	7.9	7.9	7.9	8.33	8.33	8.33	8.33	8.33	8.33	8.57	8.57	8.57	8.57	8.57	8.57	8.6	8.6	8.6	8.6	8.6	8.6	8.9	8.9	8.9	8.9	8.9	8.9
Common	Dactylonectria sp. OTU-N2	Nectriaceae		N_Dsp	1		1				1		1	1	1		1	1	1		1	1	1	1	1	1	1	1	1		1	1	1	1			1	1	1						1	1
Common	Ilyonectria sp. OTU-N4	Nectriaceae		N_Is4	1								1		1	1														1			1	1		1		1	1		1	1	1
Common	Ilyonectria sp. OTU-N5	Nectriaceae		N_Is5	1	1			1	1			1		1	1														1						1					1	1		1		1
Common	Fusarium sp. OTU-F1	Nectriaceae(Fusarium)		F_Fs1															1				1																						1	1
Common	Phomopsis columnaris	Phomopsis		P_Pco	1	1		1	1								1	1		1	1	1	1	1	1	1	1	1			1	1	1			1	1	1	1
Common	Phomopsis sp.	Phomopsis		P_Psp							1	1	1	1	1	1	1	1	1										1	1	1
Common	Monodictys sp			Monp								1													1				1	1	1
Common	Cadophora sp. A	Helotiales		H_Csa						1							1																		1						1	1	1
Common	Cadophora sp. B	Helotiales		H_Csb								1		1	1	1															1			1		1	1
Common	Helotiaceae A	Helotiales		H_Hca								1		1		1		1								1											1	1		1	1		1	1	1	1
Common	Ceratobasidium albasitensis	Rhizoctonia		R_Cal												1									1																1	1	1	1	1	1
Common	Ceratobasidium sp. OTUrD	Rhizoctonia		R_Csd	1	1					1		1		1				1
rare	Rhizoctonia butinii	Rhizoctonia		R_Rbu	1			1		1
rare	Cryptosporiopsis sp.	Helotiales		H_Csp			1					1			1
rare	Fusarium oxysporum	Nectriaceae(Fusarium)		F_Fox		1														1		1
rare	Dactylonectria macrodidyma OTU-N1	Nectriaceae		N_Dma				1																			1
rare	Bionectria ochroleuca			Boc					1
rare	Trichosporon porosum			Tpo			1
rare	Neonectria sp.	Nectriaceae		N_Nsp												1
rare	Truncatella angustata			Tan									1
rare	Pleosporales			Ple										1
rare	Mortierella verticillata			Mve								1
rare	Cryptosporiopsis radicicola	Helotiales		H_Cra														1																		1	1	1	1
rare	Cylindrocarpon (olidum)	Nectriaceae		N_Col															1				1
rare	Periconia macrospinosa			Pma																	1
rare	Glarea sp.	Helotiales		H_Gsp																	1
rare	Pyrenochaeta sp. OTU1			Pyr1																	1
rare	Fusarium sp. OTU-F5	Nectriaceae(Fusarium)		F_Fs5																					1																	1
rare	Trichothecium crotocinigenum			Tcr																						1
rare	Cylindrodendrum alicantinum	Nectriaceae		N_Cal																				1
rare	Paraphoma sp.			Parp																													1												1
rare	Gliomastix murorum			Gmu																									1
rare	Chaetomium nigricolor			Cni																											1
rare	Pyrenochaeta sp. OTU2			Pyr2																													1
rare	Mortierella gamsii			Mga																												1
rare	Mucor saturninus			Msa																												1
rare	Mucor fragilis			Mfr																												1
rare	Trichoderma harzianum	Trichoderma		T_Tha																																1
rare	Trichoderma alni	Trichoderma		T_Tal																															1
rare	Trichoderma koningiopsis	Trichoderma		T_Tko																																		1
rare	Daldinia concentrica			Dco																																				1
rare	Humicola sp.			Hump																																		1
rare	Cadophora luteo-olivacea	Helotiales		H_Clo																																		1
rare	Helotiales A	Helotiales		H_Hla																																				1
rare	Herpotrichia			Her																																			1
rare	Knufia sp			Knup																															1
rare	Ceratobasidium OTUrC	Rhizoctonia		R_Csc																																		1
rare	Volutella rosea			Vro																																						1		1	1
rare	Helotiales B	Helotiales		H_Hlb																																					1
rare	Stachybotrys sp.			Sta																																					1
rare	Fusarium sp. OTU-F2	Nectriaceae(Fusarium)		F_Fs2																																								1
rare	Fusarium redolens OTU-F4	Nectriaceae(Fusarium)		F_Fre																																						1
rare	Plectosphaerella cucumerina			Pcu																																										1
rare	Didymella vitalbina			Dvi																																							1
rare	Phoma sp.			Pho																																								1
rare	Alternaria sp.			Altp																																								1
rare	Exophiala sp.			Exo																																					1
rare	Tetracladium maxiliforme			Tma																																									1
rare	Mortierella zonata			Mzo																																						1
rare	Absidia glauca			Absg																																									1
rare	Pythium sp.			Pytp																																						1
Root ID	Location	Plant ID	P	Ca	Humus	pH	N_Dsp	N_Is4	N_Is5	F_Fs1	P_Pco	P_Psp	Monp	H_Csa	H_Csb	H_Hca	R_Cal	R_Csd	R_Rbu	H_Csp	F_Fox	N_Dma	Boc	Tpo	N_Nsp	Tan	Ple	Mve	H_Cra	N_Col	Pma	H_Gsp	Pyr1	F_Fs5	Tcr	N_Cal	Parp	Gmu	Cni	Pyr2	Mga	Msa	Mfr	T_Tha	T_Tal	T_Tko	Dco	Hump	H_Clo
1	A	A1	5	3500	9.08	7.87	1	1	1		1							1	1
2	A	A1	5	3500	9.08	7.87			1		1							1			1
3	A	A1	5	3500	9.08	7.87	1													1				1
4	A	A2	5	3500	9.08	7.87					1								1			1
5	A	A2	5	3500	9.08	7.87			1		1												1
6	A	A2	5	3500	9.08	7.87			1					1					1
7	B	B1	25	17500	11.79	8.43	1					1						1
8	B	B1	25	17500	11.79	8.43						1	1		1	1				1								1
9	B	B1	25	17500	11.79	8.43	1	1	1			1						1								1
10	B	B2	25	17500	11.79	8.43	1					1			1	1											1
11	B	B2	25	17500	11.79	8.43	1	1	1			1			1			1		1
12	B	B2	25	17500	11.79	8.43		1	1			1			1	1	1								1
13	C	C1	75	17500	11.52	7.9	1				1	1		1
14	C	C1	75	17500	11.52	7.9	1				1	1				1													1
15	C	C1	75	17500	11.52	7.9	1			1		1						1												1
16	C	C2	75	17500	11.52	7.9					1										1
17	C	C2	75	17500	11.52	7.9	1				1																				1	1	1
18	C	C2	75	17500	11.52	7.9	1				1										1
19	D	D1	75	17500	11.79	8.33	1			1	1																			1
20	D	D1	75	17500	11.79	8.33	1				1																									1
21	D	D1	75	17500	11.79	8.33	1				1		1				1																	1
22	D	D2	75	17500	11.79	8.33	1				1					1																			1
23	D	D2	75	17500	11.79	8.33	1				1											1
24	D	D2	75	17500	11.79	8.33	1				1
25	E	E1	75	25000	3.94	8.57	1					1	1																									1
26	E	E1	75	25000	3.94	8.57		1	1			1	1
27	E	E1	75	25000	3.94	8.57	1				1	1	1		1																								1
28	E	E2	75	25000	3.94	8.57	1				1																														1	1	1
29	E	E2	75	25000	3.94	8.57	1	1			1																										1			1
30	E	E2	75	25000	3.94	8.57	1	1							1
31	F	F1	10	43750	8.41	8.6								1																															1
32	F	F1	10	43750	8.41	8.6		1	1		1				1														1															1
33	F	F1	10	43750	8.41	8.6	1				1				1	1													1
34	F	F2	10	43750	8.41	8.6	1	1			1					1													1																	1		1	1
35	F	F2	10	43750	8.41	8.6	1	1			1																		1
36	F	F2	10	43750	8.41	8.6										1																															1
37	G	G1	5	43750	2.72	8.9		1	1					1		1	1
38	G	G1	5	43750	2.72	8.9		1	1					1			1																	1
39	G	G1	5	43750	2.72	8.9		1						1		1	1
40	G	G2	5	43750	2.72	8.9			1							1	1
41	G	G2	5	43750	2.72	8.9	1			1						1	1																				1
42	G	G2	5	43750	2.72	8.9	1		1	1						1	1
[truncated: 18 more columns]

## Sheet: Soil data
			acidity	NH3	NO3-	Ca2+	diluted Ca tests			humus	NO2-	P		humus(arb)	humus(%)	humus	humus		pH	pH		P		Ca2+
			3rd Feb				4th Feb				5th Feb	23rd Mar				mean	SE		mean	SE		mode		mode
			Test:	PPM	lb/acre	ppm	1in5(ppm)	1in25(ppm)	1in125(ppm)	arb.	ppm	lb/acre				(%)	(%)					(lb/acre)		(ppm)
Location	Sample		pH	ammonia	nitrate	calcium	calcium	calcium	calcium	humus	nitrite	phosphorus
A	1		7.7	0	<10	2100	350			6	<1	<10		6	9.625
	2		7.9	<5	<10	2100	700			7	1	<10		7	11.25	9.08333	1.43312		7.86667	0.0881917		5		3500
	3		8	0	15	1400	700			4	<1	25		4	6.375							<10
B	1		8.4	<5	15	2100		1000		7	1	50		7	11.25
	2		8.7	<5	15	2800		700		8	<1	25		8	12.875	11.7917	0.541667		8.43333	0.145297		25		17500
	3		8.2	<5	<10	2800		700		7	<1	25		7	11.25
C	1		7.9	<5	15	2800		1000		9	<1	75		9	14.5
	2		7.9	<5	15	2800		700		8	1	75		8	12.875	11.5208	2.21687		7.9	6.28037e-16		75		17500
	3		7.9	<5	15	2800		700		4--5	<1	100		4.5	7.1875
D	1		8.4	<5	15	2800		1000		5	<1	75		5	8
	2		8.4	<5	15	2800		700		9	<1	75		9	14.5	11.7917	1.95301		8.33333	0.0666667		75		17500
v.little clay	3		8.2	<5	15	2800		350		8	<1	100		8	12.875
E	1		8.6	<5	≤10	2800		1400		1--2	<1	75		1.5	2.3125
	2		8.5	<5	≤10	2800		1000		3--4	<1	100		3.5	5.5625	3.9375	1.625		8.56667	0.0333333		75		25000
	3		8.6	<5	<10	2800		1000		x	<1	75
F	1		8.4	<5	<10	2800			350	3--4	<1	10		3.5	5.5625
	2		8.7	<5	<10	2800			350	7	<1	25		7	11.25	8.40625	2.84375		8.6	0.1		10		43750
chalky	3		8.7	<5	<10	2800			350	x	<1	10
G	1		9	<5	<10	2800			350	2--3	<1	<10		2.5	3.9375
	2		8.6	<5	<10	2800			150	1	<1	<10		1	1.5	2.71875	1.21875		8.9	0.152753		5		43750
v.chalky	3		9.1	<5	<10	2800			350	x	<1	<10										<10
														convert humus (arb) to humus (%)
							(lb/acre)/2=ppm							assume linear relationship, with:
														1 arb = 1.5%, 5 arb = 8%
							ppm x2=lb/acre

## Sheet: varespec
	row name	N_Dsp	N_Is4	N_Is5	F_Fs1	P_Pco	P_Psp	Monp	H_Csa	H_Csb	H_Hca	R_Cal	R_Csd	R_Rbu	H_Csp	F_Fox	N_Dma	Boc	Tpo	N_Nsp	Tan	Ple	Mve	H_Cra	N_Col	Pma	H_Gsp	Pyr1	F_Fs5	Tcr	N_Cal	Parp	Gmu	Cni	Pyr2	Mga	Msa	Mfr	T_Tha	T_Tal	T_Tko	Dco	Hump	H_Clo	H_Hla	Her	Knup	R_Csc	Vro
1	A1A	1	1	1	0	1	0	0	0	0	0	0	1	1	0	0	0	0	0	0	0	0	0	0	0	0	0	0	0	0	0	0	0	0	0	0	0	0	0	0	0	0	0	0	0	0	0	0	0
2	A1B	0	0	1	0	1	0	0	0	0	0	0	1	0	0	1	0	0	0	0	0	0	0	0	0	0	0	0	0	0	0	0	0	0	0	0	0	0	0	0	0	0	0	0	0	0	0	0	0
3	A1C	1	0	0	0	0	0	0	0	0	0	0	0	0	1	0	0	0	1	0	0	0	0	0	0	0	0	0	0	0	0	0	0	0	0	0	0	0	0	0	0	0	0	0	0	0	0	0	0
4	A2A	0	0	0	0	1	0	0	0	0	0	0	0	1	0	0	1	0	0	0	0	0	0	0	0	0	0	0	0	0	0	0	0	0	0	0	0	0	0	0	0	0	0	0	0	0	0	0	0
5	A2B	0	0	1	0	1	0	0	0	0	0	0	0	0	0	0	0	1	0	0	0	0	0	0	0	0	0	0	0	0	0	0	0	0	0	0	0	0	0	0	0	0	0	0	0	0	0	0	0
6	A2C	0	0	1	0	0	0	0	1	0	0	0	0	1	0	0	0	0	0	0	0	0	0	0	0	0	0	0	0	0	0	0	0	0	0	0	0	0	0	0	0	0	0	0	0	0	0	0	0
7	B1A	1	0	0	0	0	1	0	0	0	0	0	1	0	0	0	0	0	0	0	0	0	0	0	0	0	0	0	0	0	0	0	0	0	0	0	0	0	0	0	0	0	0	0	0	0	0	0	0
8	B1B	0	0	0	0	0	1	1	0	1	1	0	0	0	1	0	0	0	0	0	0	0	1	0	0	0	0	0	0	0	0	0	0	0	0	0	0	0	0	0	0	0	0	0	0	0	0	0	0
9	B1C	1	1	1	0	0	1	0	0	0	0	0	1	0	0	0	0	0	0	0	1	0	0	0	0	0	0	0	0	0	0	0	0	0	0	0	0	0	0	0	0	0	0	0	0	0	0	0	0
10	B2A	1	0	0	0	0	1	0	0	1	1	0	0	0	0	0	0	0	0	0	0	1	0	0	0	0	0	0	0	0	0	0	0	0	0	0	0	0	0	0	0	0	0	0	0	0	0	0	0
11	B2B	1	1	1	0	0	1	0	0	1	0	0	1	0	1	0	0	0	0	0	0	0	0	0	0	0	0	0	0	0	0	0	0	0	0	0	0	0	0	0	0	0	0	0	0	0	0	0	0
12	B2C	0	1	1	0	0	1	0	0	1	1	1	0	0	0	0	0	0	0	1	0	0	0	0	0	0	0	0	0	0	0	0	0	0	0	0	0	0	0	0	0	0	0	0	0	0	0	0	0
13	C1A	1	0	0	0	1	1	0	1	0	0	0	0	0	0	0	0	0	0	0	0	0	0	0	0	0	0	0	0	0	0	0	0	0	0	0	0	0	0	0	0	0	0	0	0	0	0	0	0
14	C1B	1	0	0	0	1	1	0	0	0	1	0	0	0	0	0	0	0	0	0	0	0	0	1	0	0	0	0	0	0	0	0	0	0	0	0	0	0	0	0	0	0	0	0	0	0	0	0	0
15	C1C	1	0	0	1	0	1	0	0	0	0	0	1	0	0	0	0	0	0	0	0	0	0	0	1	0	0	0	0	0	0	0	0	0	0	0	0	0	0	0	0	0	0	0	0	0	0	0	0
16	C2A	0	0	0	0	1	0	0	0	0	0	0	0	0	0	1	0	0	0	0	0	0	0	0	0	0	0	0	0	0	0	0	0	0	0	0	0	0	0	0	0	0	0	0	0	0	0	0	0
17	C2B	1	0	0	0	1	0	0	0	0	0	0	0	0	0	0	0	0	0	0	0	0	0	0	0	1	1	1	0	0	0	0	0	0	0	0	0	0	0	0	0	0	0	0	0	0	0	0	0
18	C2C	1	0	0	0	1	0	0	0	0	0	0	0	0	0	1	0	0	0	0	0	0	0	0	0	0	0	0	0	0	0	0	0	0	0	0	0	0	0	0	0	0	0	0	0	0	0	0	0
19	D1A	1	0	0	1	1	0	0	0	0	0	0	0	0	0	0	0	0	0	0	0	0	0	0	1	0	0	0	0	0	0	0	0	0	0	0	0	0	0	0	0	0	0	0	0	0	0	0	0
20	D1B	1	0	0	0	1	0	0	0	0	0	0	0	0	0	0	0	0	0	0	0	0	0	0	0	0	0	0	0	0	1	0	0	0	0	0	0	0	0	0	0	0	0	0	0	0	0	0	0
21	D1C	1	0	0	0	1	0	1	0	0	0	1	0	0	0	0	0	0	0	0	0	0	0	0	0	0	0	0	1	0	0	0	0	0	0	0	0	0	0	0	0	0	0	0	0	0	0	0	0
22	D2A	1	0	0	0	1	0	0	0	0	1	0	0	0	0	0	0	0	0	0	0	0	0	0	0	0	0	0	0	1	0	0	0	0	0	0	0	0	0	0	0	0	0	0	0	0	0	0	0
23	D2B	1	0	0	0	1	0	0	0	0	0	0	0	0	0	0	1	0	0	0	0	0	0	0	0	0	0	0	0	0	0	0	0	0	0	0	0	0	0	0	0	0	0	0	0	0	0	0	0
24	D2C	1	0	0	0	1	0	0	0	0	0	0	0	0	0	0	0	0	0	0	0	0	0	0	0	0	0	0	0	0	0	0	0	0	0	0	0	0	0	0	0	0	0	0	0	0	0	0	0
25	E1A	1	0	0	0	0	1	1	0	0	0	0	0	0	0	0	0	0	0	0	0	0	0	0	0	0	0	0	0	0	0	0	1	0	0	0	0	0	0	0	0	0	0	0	0	0	0	0	0
26	E1B	0	1	1	0	0	1	1	0	0	0	0	0	0	0	0	0	0	0	0	0	0	0	0	0	0	0	0	0	0	0	0	0	0	0	0	0	0	0	0	0	0	0	0	0	0	0	0	0
27	E1C	1	0	0	0	1	1	1	0	1	0	0	0	0	0	0	0	0	0	0	0	0	0	0	0	0	0	0	0	0	0	0	0	1	0	0	0	0	0	0	0	0	0	0	0	0	0	0	0
28	E2A	1	0	0	0	1	0	0	0	0	0	0	0	0	0	0	0	0	0	0	0	0	0	0	0	0	0	0	0	0	0	0	0	0	0	1	1	1	0	0	0	0	0	0	0	0	0	0	0
29	E2B	1	1	0	0	1	0	0	0	0	0	0	0	0	0	0	0	0	0	0	0	0	0	0	0	0	0	0	0	0	0	1	0	0	1	0	0	0	0	0	0	0	0	0	0	0	0	0	0
30	E2C	1	1	0	0	0	0	0	0	1	0	0	0	0	0	0	0	0	0	0	0	0	0	0	0	0	0	0	0	0	0	0	0	0	0	0	0	0	0	0	0	0	0	0	0	0	0	0	0
31	F1A	0	0	0	0	0	0	0	1	0	0	0	0	0	0	0	0	0	0	0	0	0	0	0	0	0	0	0	0	0	0	0	0	0	0	0	0	0	0	1	0	0	0	0	0	0	1	0	0
32	F1B	0	1	1	0	1	0	0	0	1	0	0	0	0	0	0	0	0	0	0	0	0	0	1	0	0	0	0	0	0	0	0	0	0	0	0	0	0	1	0	0	0	0	0	0	0	0	0	0
33	F1C	1	0	0	0	1	0	0	0	1	1	0	0	0	0	0	0	0	0	0	0	0	0	1	0	0	0	0	0	0	0	0	0	0	0	0	0	0	0	0	0	0	0	0	0	0	0	0	0
34	F2A	1	1	0	0	1	0	0	0	0	1	0	0	0	0	0	0	0	0	0	0	0	0	1	0	0	0	0	0	0	0	0	0	0	0	0	0	0	0	0	1	0	1	1	0	0	0	1	0
35	F2B	1	1	0	0	1	0	0	0	0	0	0	0	0	0	0	0	0	0	0	0	0	0	1	0	0	0	0	0	0	0	0	0	0	0	0	0	0	0	0	0	0	0	0	0	1	0	0	0
36	F2C	0	0	0	0	0	0	0	0	0	1	0	0	0	0	0	0	0	0	0	0	0	0	0	0	0	0	0	0	0	0	0	0	0	0	0	0	0	0	0	0	1	0	0	1	0	0	0	0
37	G1A	0	1	1	0	0	0	0	1	0	1	1	0	0	0	0	0	0	0	0	0	0	0	0	0	0	0	0	0	0	0	0	0	0	0	0	0	0	0	0	0	0	0	0	0	0	0	0	0
38	G1B	0	1	1	0	0	0	0	1	0	0	1	0	0	0	0	0	0	0	0	0	0	0	0	0	0	0	0	1	0	0	0	0	0	0	0	0	0	0	0	0	0	0	0	0	0	0	0	1
39	G1C	0	1	0	0	0	0	0	1	0	1	1	0	0	0	0	0	0	0	0	0	0	0	0	0	0	0	0	0	0	0	0	0	0	0	0	0	0	0	0	0	0	0	0	0	0	0	0	0
40	G2A	0	0	1	0	0	0	0	0	0	1	1	0	0	0	0	0	0	0	0	0	0	0	0	0	0	0	0	0	0	0	0	0	0	0	0	0	0	0	0	0	0	0	0	0	0	0	0	1
41	G2B	1	0	0	1	0	0	0	0	0	1	1	0	0	0	0	0	0	0	0	0	0	0	0	0	0	0	0	0	0	0	1	0	0	0	0	0	0	0	0	0	0	0	0	0	0	0	0	1
42	G2C	1	0	1	1	0	0	0	0	0	1	1	0	0	0	0	0	0	0	0	0	0	0	0	0	0	0	0	0	0	0	0	0	0	0	0	0	0	0	0	0	0	0	0	0	0	0	0	0
[truncated: 14 more columns]

## Sheet: varechem
	row name	P	Ca	Humus	pH
1	A1A	5	3500	9.08	7.87
2	A1B	5	3500	9.08	7.87
3	A1C	5	3500	9.08	7.87
4	A2A	5	3500	9.08	7.87
5	A2B	5	3500	9.08	7.87
6	A2C	5	3500	9.08	7.87
7	B1A	25	17500	11.79	8.43
8	B1B	25	17500	11.79	8.43
9	B1C	25	17500	11.79	8.43
10	B2A	25	17500	11.79	8.43
11	B2B	25	17500	11.79	8.43
12	B2C	25	17500	11.79	8.43
13	C1A	75	17500	11.52	7.9
14	C1B	75	17500	11.52	7.9
15	C1C	75	17500	11.52	7.9
16	C2A	75	17500	11.52	7.9
17	C2B	75	17500	11.52	7.9
18	C2C	75	17500	11.52	7.9
19	D1A	75	17500	11.79	8.33
20	D1B	75	17500	11.79	8.33
21	D1C	75	17500	11.79	8.33
22	D2A	75	17500	11.79	8.33
23	D2B	75	17500	11.79	8.33
24	D2C	75	17500	11.79	8.33
25	E1A	75	25000	3.94	8.57
26	E1B	75	25000	3.94	8.57
27	E1C	75	25000	3.94	8.57
28	E2A	75	25000	3.94	8.57
29	E2B	75	25000	3.94	8.57
30	E2C	75	25000	3.94	8.57
31	F1A	10	43750	8.41	8.6
32	F1B	10	43750	8.41	8.6
33	F1C	10	43750	8.41	8.6
34	F2A	10	43750	8.41	8.6
35	F2B	10	43750	8.41	8.6
36	F2C	10	43750	8.41	8.6
37	G1A	5	43750	2.72	8.9
38	G1B	5	43750	2.72	8.9
39	G1C	5	43750	2.72	8.9
40	G2A	5	43750	2.72	8.9
41	G2B	5	43750	2.72	8.9
42	G2C	5	43750	2.72	8.9
